# Supplementary material for: New ruthenium(ii) complexes with cyclic thio- and semicarbazone: evaluation of cytotoxicity and effects on cell migration and apoptosis of lung cancer cells
Source: Royal Society of Chemistry journal article supplement (doi:10.1039/d3dt00750b), 2023-01-01
Supplement: d3dt00750b1.pdf [file d3dt00750b1.pdf]

**New ruthenium(II) complexes with cyclic thio- and semicarbazone: Evaluation of cytotoxicity and effects on cell migration and apoptosis of lung cancer cells**

Yasmim G. Gonçalves<sup>a,b</sup>, Amanda B. Becceneri<sup>b</sup>, Angelica E. Graminha<sup>b,g</sup>, Victor M. Miranda<sup>c</sup>, Rafaella R. Rios<sup>b</sup>, Francisco Rinaldi-Neto<sup>b</sup>, Mônica S. Costa<sup>d</sup>, Ana C. R. Gonçalves<sup>e</sup>, Victor M. Deflon<sup>b</sup>, Kelly A. G. Yoneyama<sup>d</sup>, Pedro I. S. Maia<sup>c</sup>, Eduardo F. Franca<sup>f</sup>, Márcia R. Cominetti<sup>g</sup>, Roberto S. Silva<sup>b</sup>, Gustavo Von Poelhsitz<sup>a\*</sup>

<sup>a</sup>Chemistry Institute, Federal University of Uberlândia, Uberlândia–MG, Brazil; <sup>b</sup>Laboratório de Fotoquímica e Química Bioinorgânica, School of Pharmaceutical Sciences, University of São Paulo, Ribeirão Preto–SP, Brazil; <sup>c</sup>Grupo de Química Inorgânica Estrutural e Biológica, Chemistry Institute of São Carlos, Universidade de São Paulo, USP–São Carlos, São Carlos–SP, Brazil; <sup>d</sup>Genetic and Biochemistry Institute, Federal University of Uberlândia, Uberlândia–MG, Brazil; <sup>e</sup>Exacts, Natural Sciences, and Education, Federal University of Triângulo Mineiro, Uberaba–MG, Brazil; <sup>f</sup>Laboratório de Cristalografia e Química Computacional, Chemistry Institute, Federal University of Uberlândia, Uberlândia–MG, Brazil; <sup>g</sup>Gerontology Department, Federal University of São Carlos, São Carlos–SP, Brazil.

**\*Corresponding author:** Prof. Dr. Gustavo Von Poelhsitz

Phone.: +55 34 3291-4143 #225, Fax: +55 34 3239-4208 – Laboratory address: Av. João Naves de Ávila, 2121, CEP: 38400-902 – Uberlândia, MG, Brazil. E-mail: [gustavopoelhsitz@ufu.br](mailto:gustavopoelhsitz@ufu.br).

## Supplementary Data

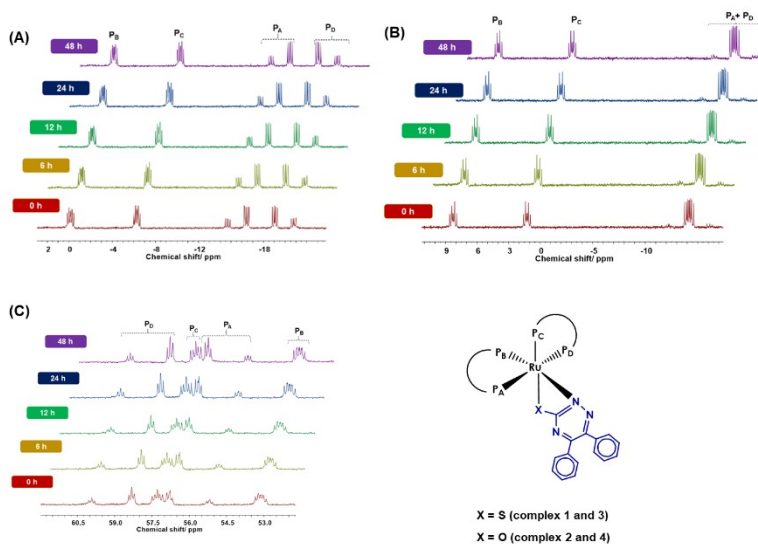

**Figure S1.**  $^{31}\text{P}$   $\{^1\text{H}\}$  NMR spectra of complex (A) **1**, (B) **2** and (C) **4**, obtained at 0 (red line), 6 (yellow line), 12 (green line), 24 (blue line) and 48 h (purple line) after solubilization in the  $\text{DMSO-}d_6$  solvent, with phosphorus atoms identified.

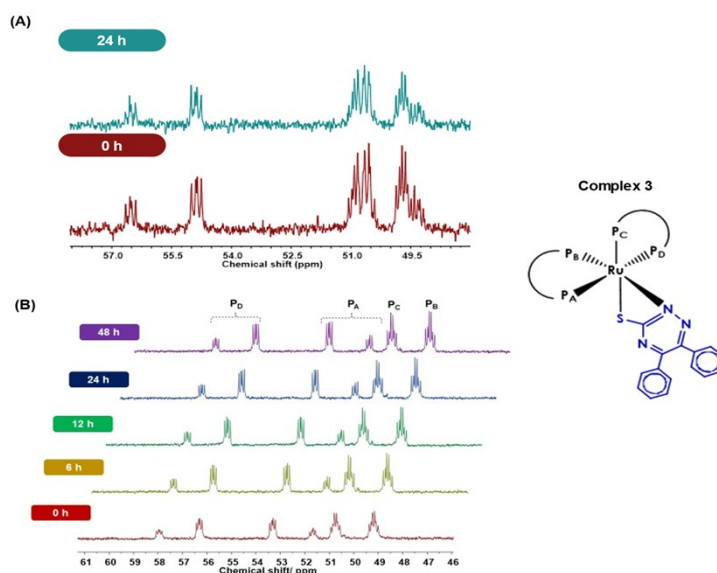

**Figure S2.**  $^{31}\text{P}$   $\{^1\text{H}\}$  NMR spectra of complex **3** obtained at (A) 0 (dark red line) and 24 h (blue line) after solubilization in the PBS 1X, with 10% (w/v) of DMSO; (B) 0 (red line), 6 (yellow line), 12 (green line), 24 (blue line) and 48 h (purple line) after solubilization in the  $\text{DMSO-}d_6$  solvent, with phosphorus atoms identified.

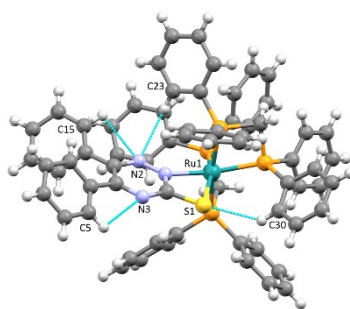

**Figure S3.** Intramolecular interactions, represented by the blue dotted lines, in the crystal packing of complex  $1 \cdot 0.5\text{CH}_2\text{Cl}_2$ .

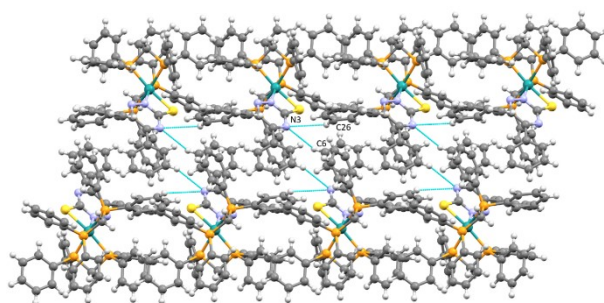

**Figure S4.** Intermolecular interactions, represented by the blue dotted lines, in the crystal packing of complex  $1 \cdot 0.5\text{CH}_2\text{Cl}_2$  that involves the N3 atom.

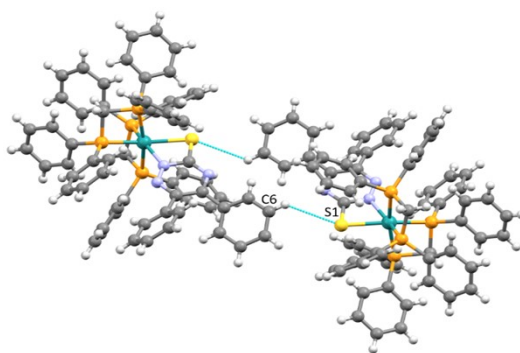

**Figure S5.** Intermolecular interactions, represented by the blue dotted lines, in the crystal packing of complex  $1 \cdot 0.5\text{CH}_2\text{Cl}_2$  that involves the S1 atom.

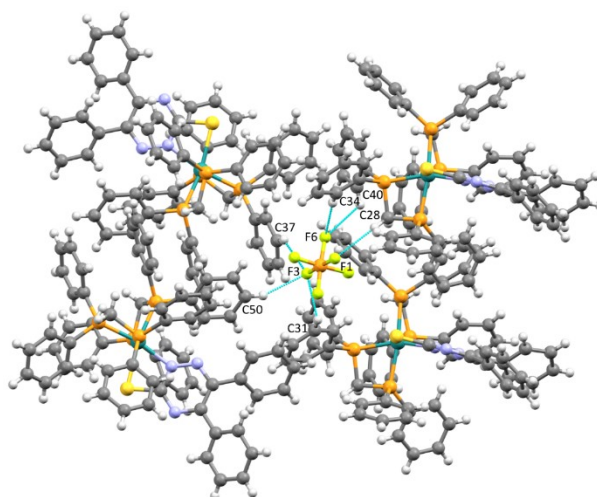

**Figure S6.** Intermolecular interactions, represented by the blue dotted lines, in the crystal packing of complex **1**·0.5CH<sub>2</sub>Cl<sub>2</sub> that involves the PF<sub>6</sub><sup>-</sup> counter ion.

**Table S1.** Crystal data and structure refinement for **1**·0.5CH<sub>2</sub>Cl<sub>2</sub>.

|                                              |                                                                                                                     |                            |
|----------------------------------------------|---------------------------------------------------------------------------------------------------------------------|----------------------------|
| Empirical formula                            | C <sub>65</sub> H <sub>54</sub> P <sub>5</sub> SN <sub>3</sub> F <sub>6</sub> Ru·0.5CH <sub>2</sub> Cl <sub>2</sub> |                            |
| Formula weight (g mol <sup>-1</sup> )        | 1321.55                                                                                                             |                            |
| Temperature (K)                              | 296(2)                                                                                                              |                            |
| Wavelength (Å)                               | 0.71073                                                                                                             |                            |
| Crystal system                               | Monoclinic                                                                                                          |                            |
| Space group                                  | P2 <sub>1</sub> /c                                                                                                  |                            |
| Unit cell dimensions                         | $a = 20.283(2)$ Å                                                                                                   | $\alpha = 90^\circ$        |
|                                              | $b = 11.3236(10)$ Å                                                                                                 | $\beta = 104.824(4)^\circ$ |
|                                              | $c = 29.017(3)$ Å                                                                                                   | $\gamma = 90^\circ$        |
| Volume (Å <sup>3</sup> )                     | 6442.7(12)                                                                                                          |                            |
| <i>Z</i>                                     | 4                                                                                                                   |                            |
| Absorption coefficient (mm <sup>-1</sup> )   | 0.458                                                                                                               |                            |
| Crystal size (mm <sup>3</sup> )              | 0.33 x 0.11 x 0.02                                                                                                  |                            |
| Theta range for data collection (°)          | 1.452 to 26.365                                                                                                     |                            |
| Index ranges                                 | -25 ≤ <i>h</i> ≤ 25                                                                                                 |                            |
|                                              | -14 ≤ <i>k</i> ≤ 14                                                                                                 |                            |
|                                              | -36 ≤ <i>l</i> ≤ 36                                                                                                 |                            |
| Reflections collected                        | 159105                                                                                                              |                            |
| Data/restraints/parameters                   | 13109 / 155 / 856                                                                                                   |                            |
| Absorption correction                        | Full matrix least-squares on F <sup>2</sup>                                                                         |                            |
| <i>Goodness-of-fit</i> on F <sup>2</sup>     | 1.017                                                                                                               |                            |
| Final R indices [ <i>I</i> > 2σ( <i>I</i> )] | $R_I = 0.0505$                                                                                                      |                            |

R indices (all data)

$$wR_2 = 0.1116$$

$$R_I = 0.0803$$

$$wR_2 = 0.1278$$

**Table S2.** Main calculated distances for intermolecular interactions between 1-4 complexes and DNA.

| Complex | Interaction nature                               | Interaction                | Distance (Å) |
|---------|--------------------------------------------------|----------------------------|--------------|
| (1)     | Hydrophobic<br>( $\pi$ - $\pi$ )                 | DG10 $\cdots$ LIG1:dppm    | 4.47         |
|         |                                                  | DG10 $\cdots$ LIG1:dppm    | 3.39         |
|         |                                                  | DG10 $\cdots$ LIG1:dppm    | 4.39         |
|         |                                                  | DG9 $\cdots$ LIG1:dppm     | 3.67         |
|         |                                                  | DG9 $\cdots$ LIG1:dppm     | 4.49         |
|         |                                                  | DC1 $\cdots$ LIG1:dppm     | 5.65         |
|         | Hydrogen bond<br>(S $\cdots$ H and S $\cdots$ O) | DG9:H21 $\cdots$ LIG1:S    | 2.73         |
|         |                                                  | DG9:H22 $\cdots$ LIG1:S    | 2.51         |
|         |                                                  | LIG1:S $\cdots$ DC2:O2     | 3.04         |
|         | $\pi$ - S                                        | LIG1:S $\cdots$ DG9        | 5.58         |
|         |                                                  | LIG1:S $\cdots$ DG9        | 5.61         |
| (2)     | Hydrophobic<br>( $\pi$ - $\pi$ )                 | DG9 $\cdots$ LIG2:dppm     | 4.28         |
|         |                                                  | DG9 $\cdots$ LIG2:dppm     | 3.67         |
|         |                                                  | DG10 $\cdots$ LIG2:dppm    | 4.26         |
|         |                                                  | DG10 $\cdots$ LIG2:dppm    | 3.26         |
|         |                                                  | DG10 $\cdots$ LIG2:Bsc     | 4.74         |
|         |                                                  | DC1 $\cdots$ LIG2:Bsc      | 3.89         |
|         |                                                  | DC1 $\cdots$ LIG2:dppm     | 4.69         |
|         |                                                  | DC2 $\cdots$ LIG2:dppm     | 3.60         |
|         | Hydrogen bond<br>(N $\cdots$ H)                  | DG10:H1' $\cdots$ LIG2:N   | 2.91         |
|         | Electrostatic<br>( $\pi$ - Anion)                | DC2:OP1 $\cdots$ LIG2:dppm | 3.70         |
| (3)     | Hydrophobic<br>( $\pi$ - $\sigma$ )              | LIG3:C1 $\cdots$ DG9       | 3.85         |
|         | Hydrogen bond<br>(S $\cdots$ O and N $\cdots$ O) | LIG3:S $\cdots$ DC2:O2     | 3.30         |
|         |                                                  | LIG3:N $\cdots$ DC2:O4'    | 3.00         |
| (4)     | Hydrophobic<br>( $\pi$ - $\pi$ )                 | DC2 $\cdots$ LIG4:Bsc      | 3.31         |
|         |                                                  | DC1 $\cdots$ LIG4:Bsc      | 4.33         |
|         |                                                  | DC1 $\cdots$ LIG4:Bsc      | 5.55         |
|         |                                                  | DG9 $\cdots$ LIG4:dppe     | 3.88         |
|         |                                                  | DG9 $\cdots$ LIG4:dppe     | 4.12         |
|         |                                                  | DG10 $\cdots$ LIG4:dppe    | 3.35         |
|         |                                                  | DG10 $\cdots$ LIG4:dppe    | 3.35         |

|                                    |  |                  |      |
|------------------------------------|--|------------------|------|
|                                    |  | DG10...LIG4:dppe | 4.18 |
| Hydrogen bond<br>(N...H and O...H) |  | DG9:H21...LIG4:N | 2.50 |
|                                    |  | DG9:H22...LIG4:O | 1.90 |

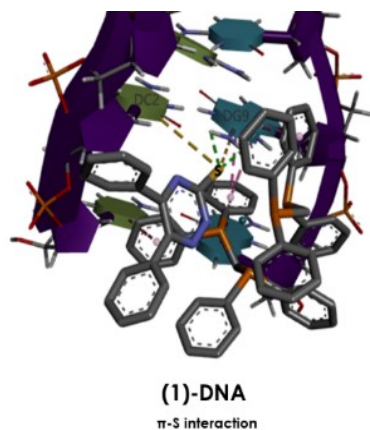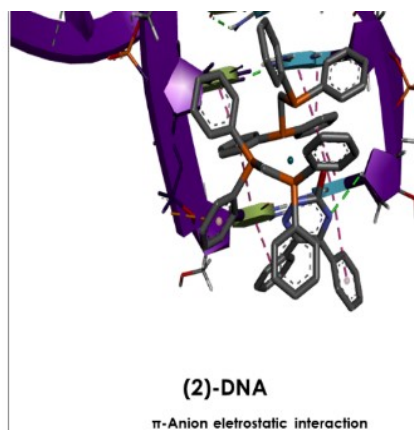

**Figure S7.** Other interactions suggested for complexes 1 and 2,  $\pi$ - S interaction (dashed yellow line) between complex 1 and DNA and  $\pi$ -Anion (dashed orange line) electrostatic interaction for complex 2 and DNA.

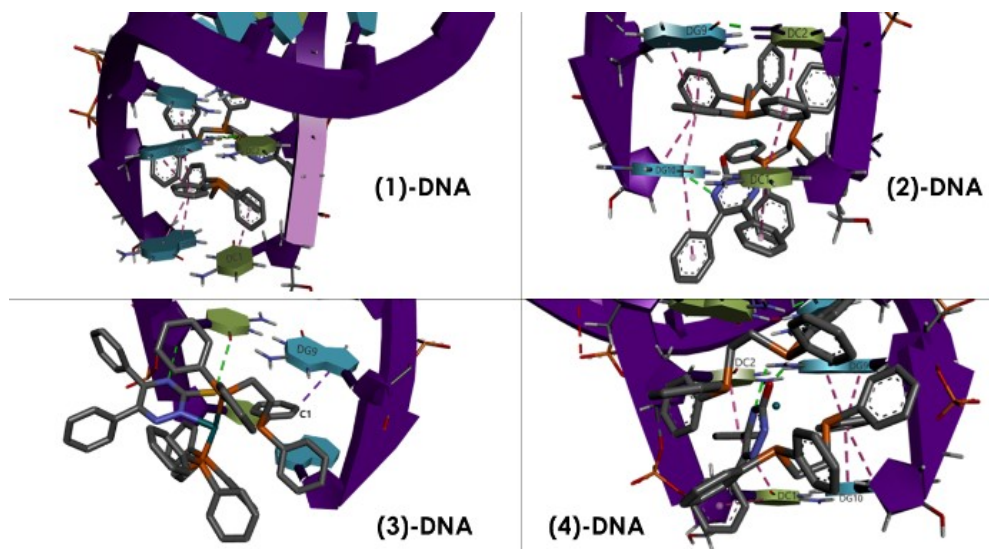

**Figure S8.** Hydrophobic interactions of  $\pi$ -  $\pi$  nature (dashed pink line) and  $\pi$ -  $\sigma$  (dashed purple line) for complexes 1-4 and DNA.

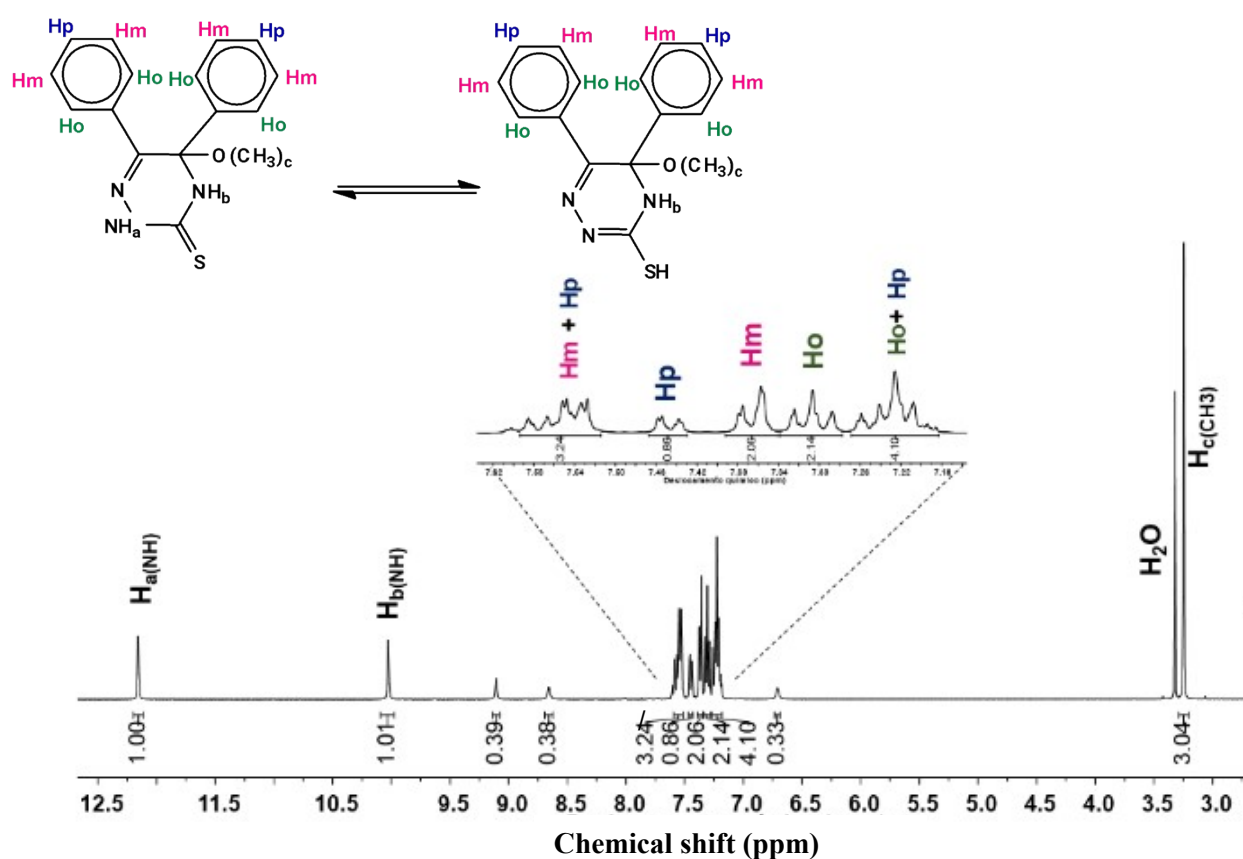

**Figure S9.**  $^1H$  NMR spectrum of free ligand Btsc, obtained in  $d^6$ -DMSO and frequency of 400 MHz, with identified hydrogens and magnification in the region between 7.65–7.10 ppm.

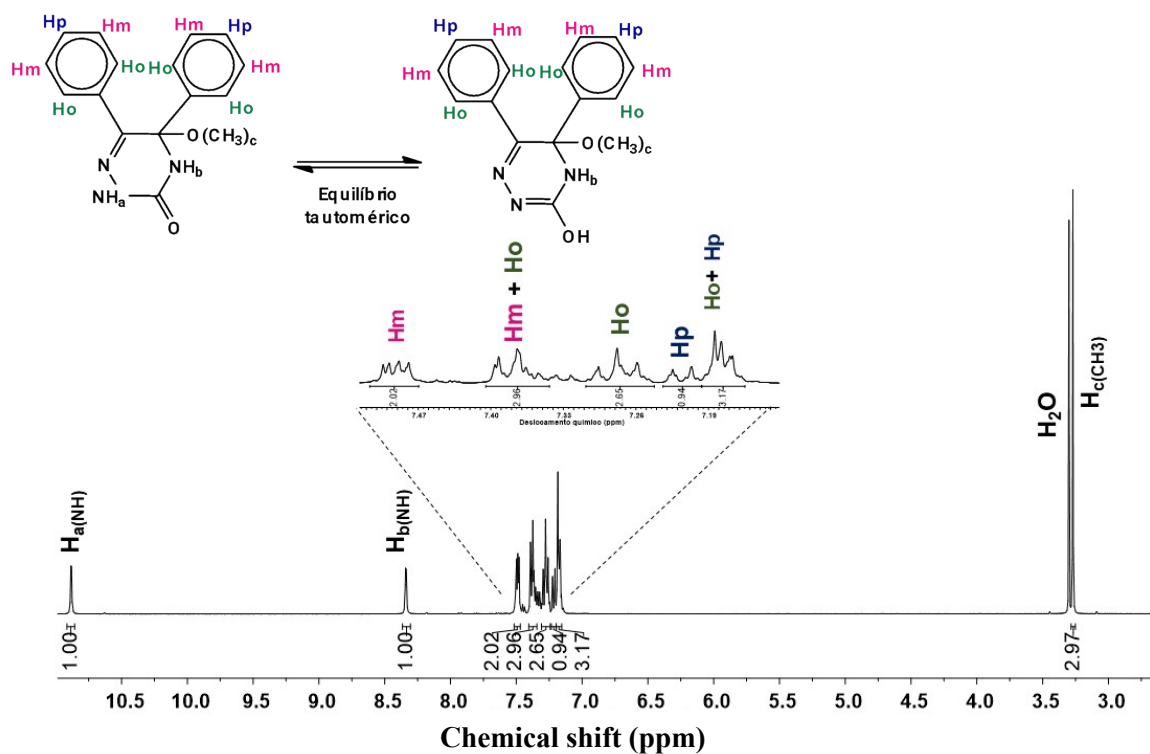

**Figure S10.**  $^1\text{H}$  NMR spectrum of free ligand Btsc, obtained in  $\text{DMSO-}d_6$  and frequency of 400 MHz, with identified hydrogens and magnification in the region between 7.60–7.10 ppm.

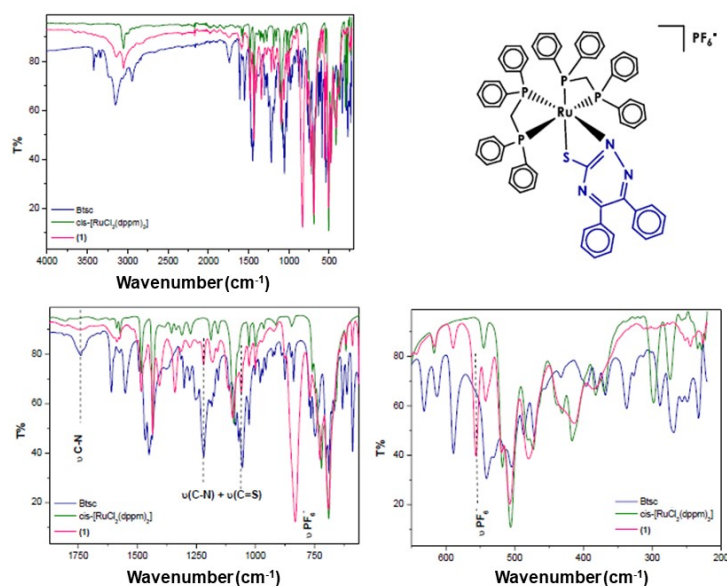

**Figure S11.** FTIR-ATR spectra of the Btsc free ligand (blue line), the  $\text{cis-}[\text{RuCl}_2(\text{dppe})_2]$  precursor (green line) and complex 1 (pink line).

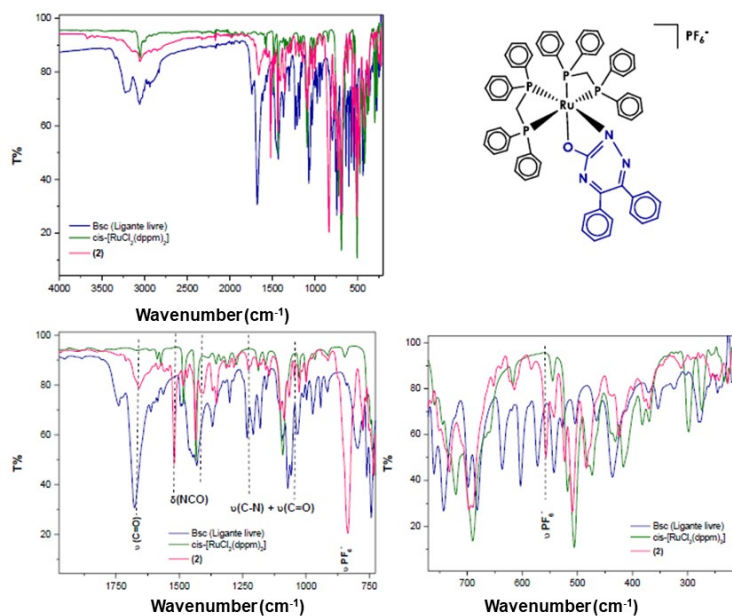

**Figure S12.** FTIR-ATR spectra of the Bsc free ligand (blue line), the  $\text{cis-}[\text{RuCl}_2(\text{dppe})_2]$  precursor (green line) and complex 2 (pink line).

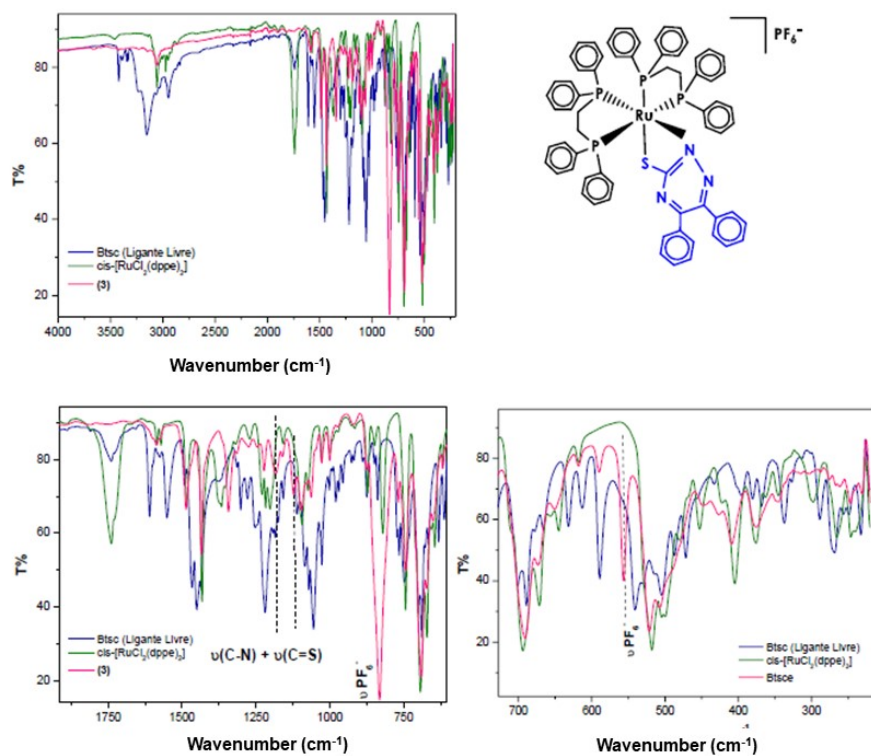

**Figure S13.** FTIR-ATR spectra of the Btsc free ligand (blue line), the  $\text{cis-[RuCl}_2(\text{dppe})_2]$  precursor (green line) and complex **3** (pink line).

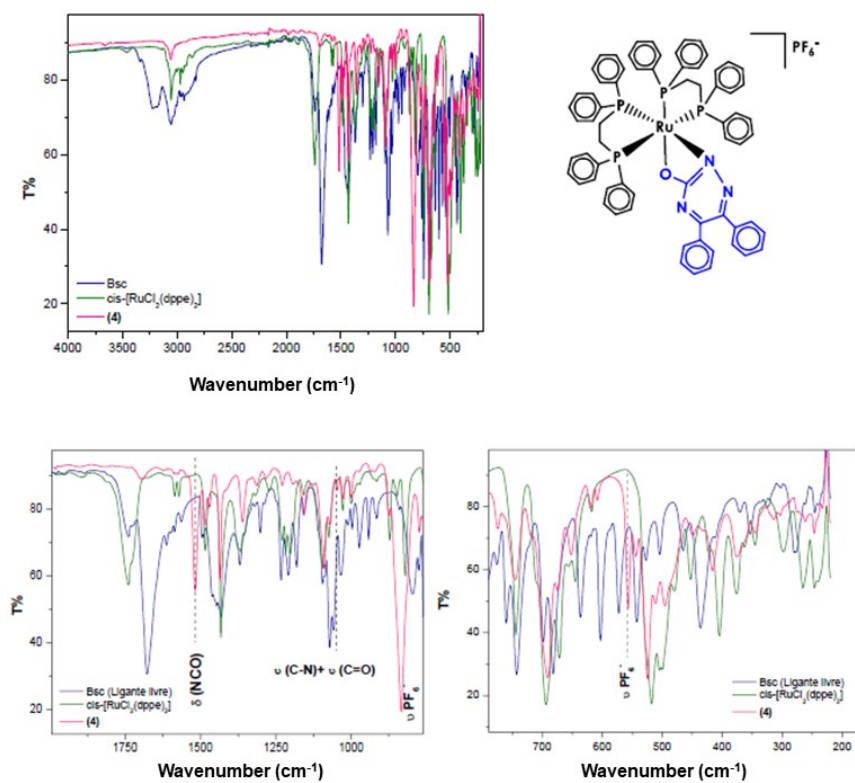

**Figure S14.** FTIR-ATR spectra of the Bsc free ligand (blue line), the *cis*-[RuCl<sub>2</sub>(dppe)<sub>2</sub>] precursor (green line) and complex **4** (pink line).

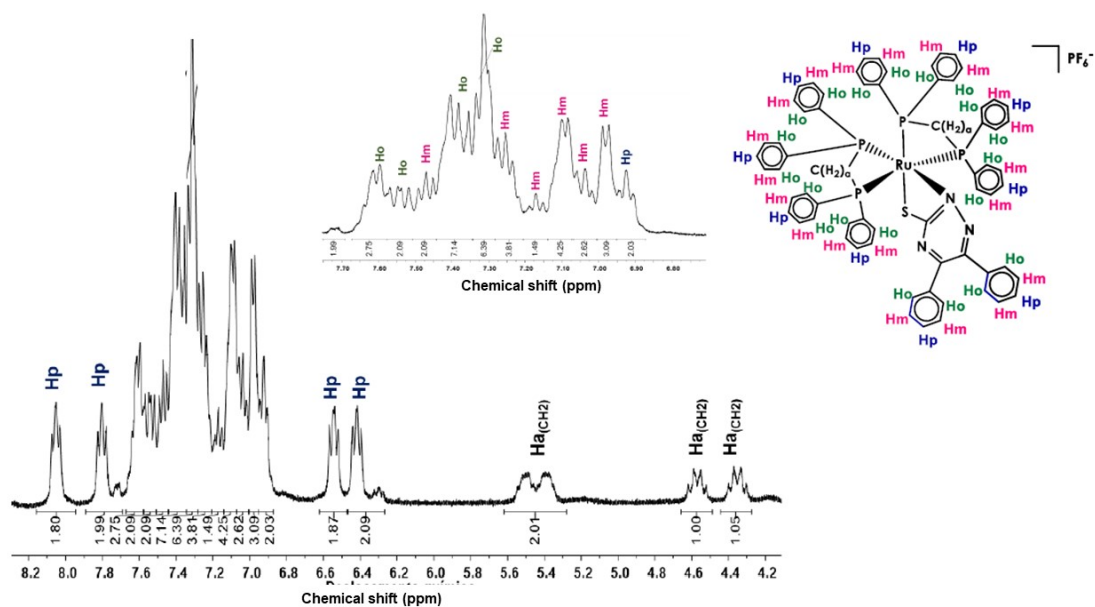

**Figure S15.** <sup>1</sup>H NMR spectra of complex **1**, obtained in DMSO-*d*<sub>6</sub> solvent at a frequency of 400 MHz, with its identified hydrogens.

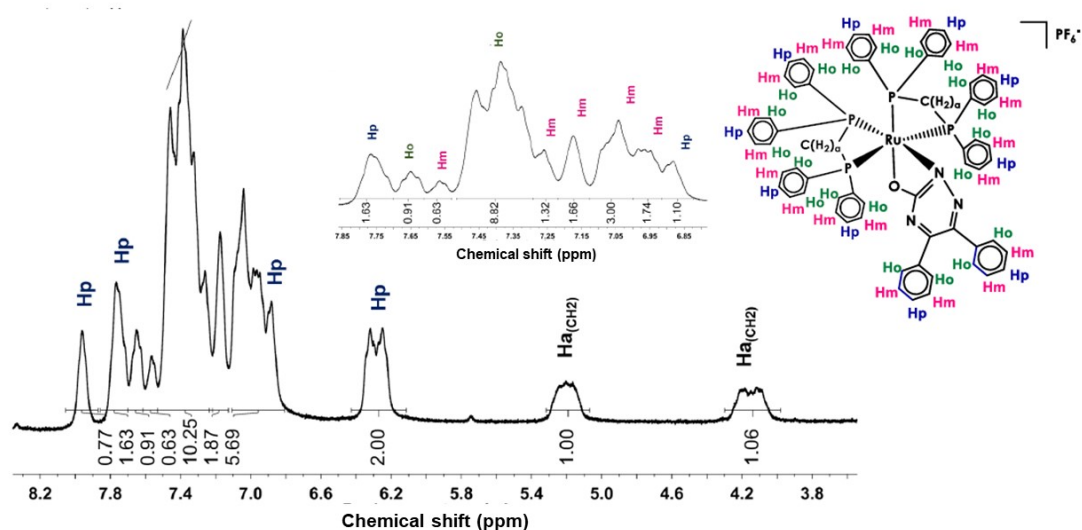

**Figure S16.** <sup>1</sup>H NMR spectra of complex **2**, obtained in DMSO-*d*<sub>6</sub> solvent at a frequency of 400 MHz, with its identified hydrogens.

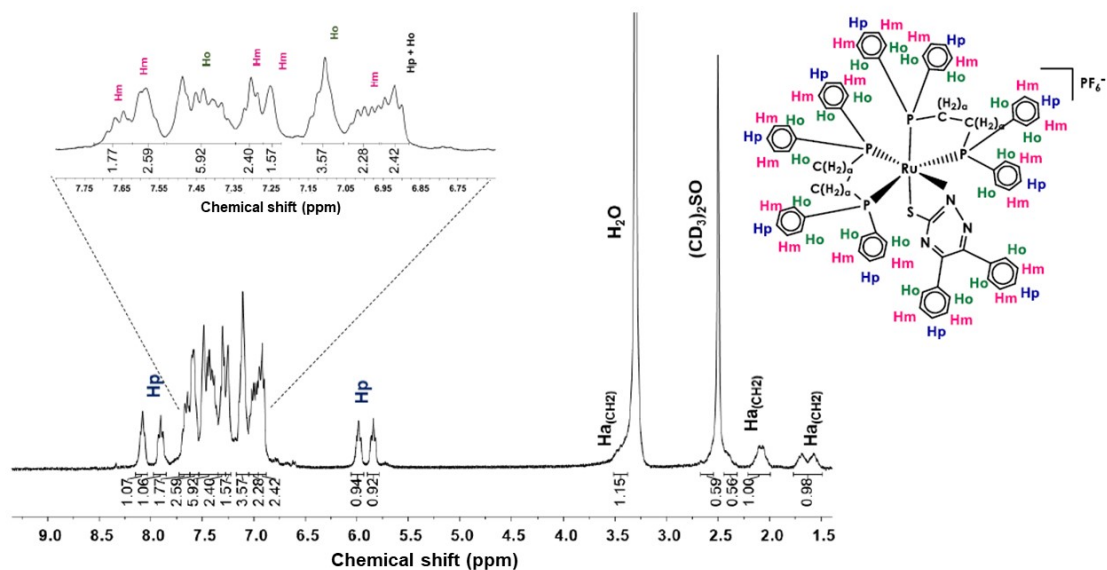

**Figure S17.**  $^1\text{H}$  NMR spectra of complex **3**, obtained in  $\text{DMSO}-d_6$  solvent at a frequency of 400 MHz, with its identified hydrogen atoms.

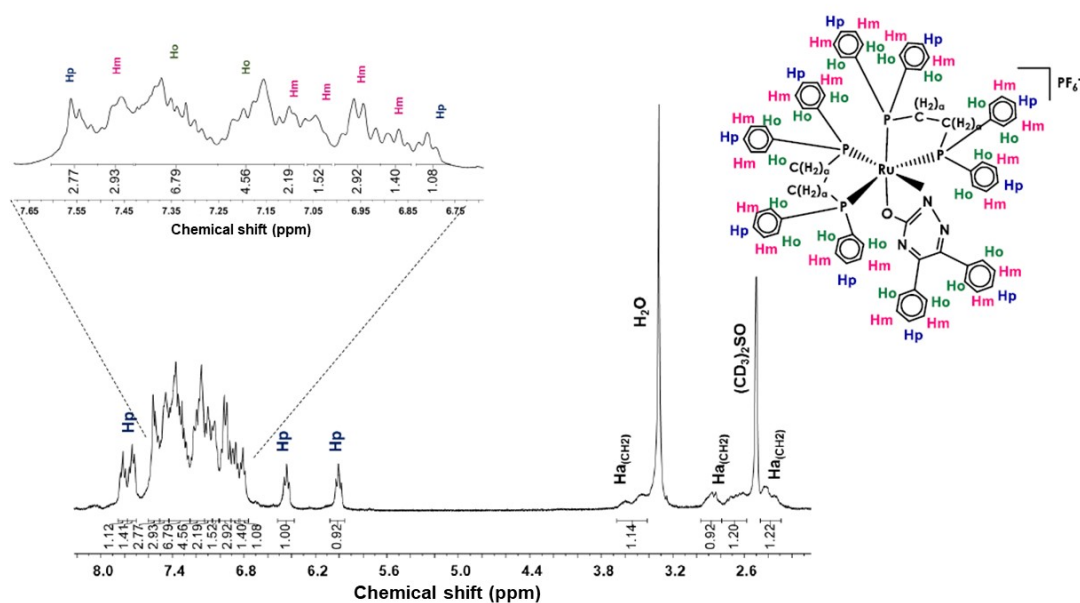

**Figure S18.**  $^1\text{H}$  NMR spectra of complex **3**, obtained in  $\text{DMSO}-d_6$  solvent at a frequency of 400 MHz, with its identified hydrogen atoms.

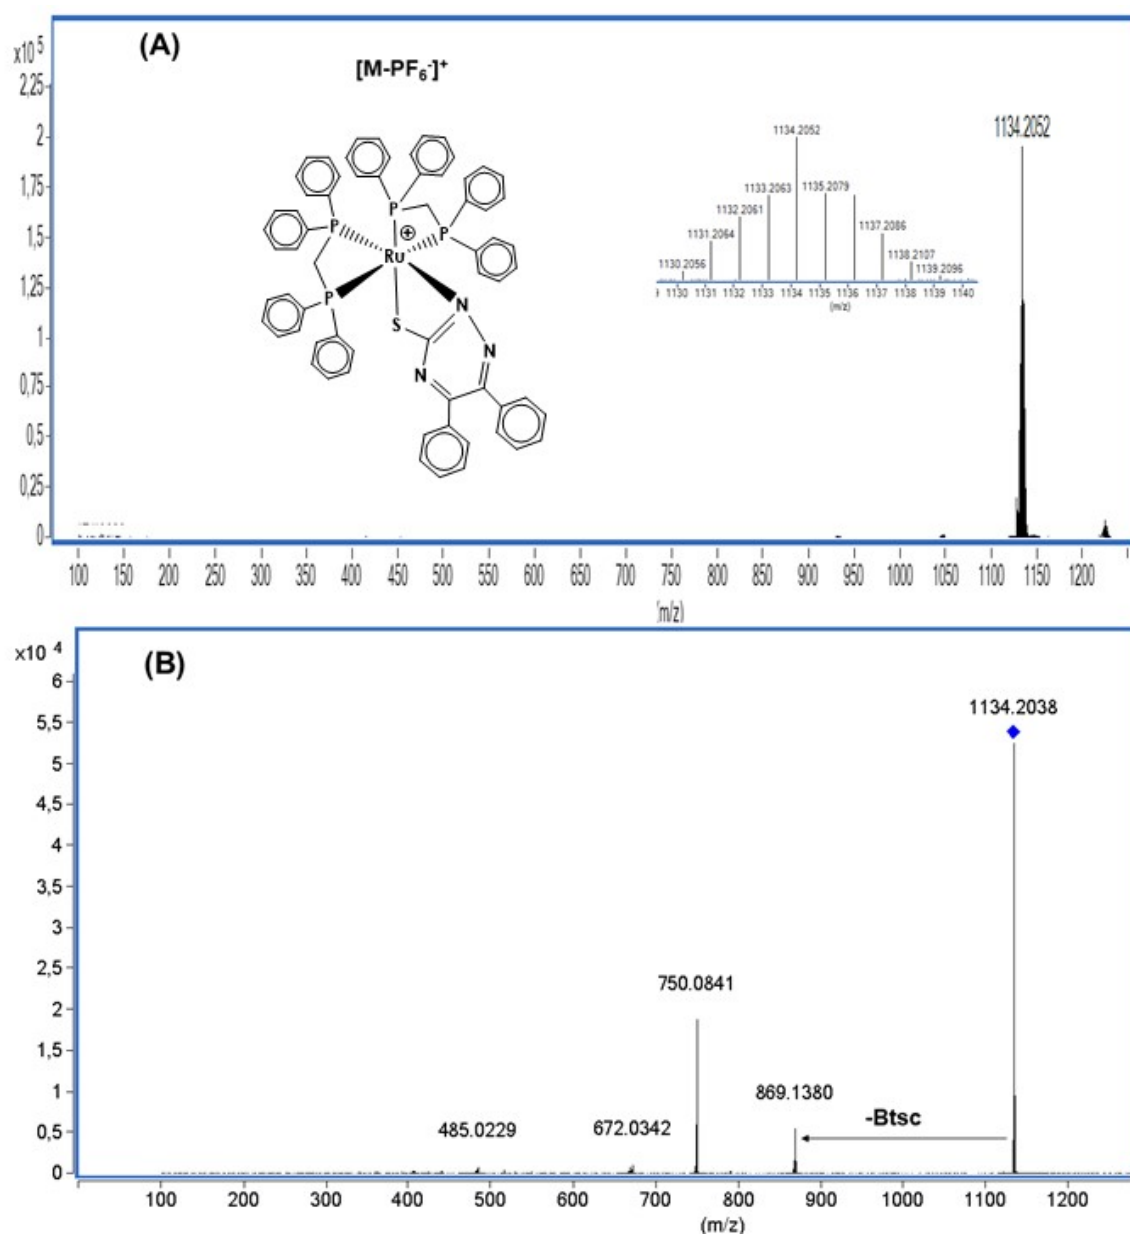

**Figure S19.** (A) HRESI-MS mass spectrum of complex **1**. (B) HRESI-MS/MS spectrum with fragmentation pattern of complex **1**.

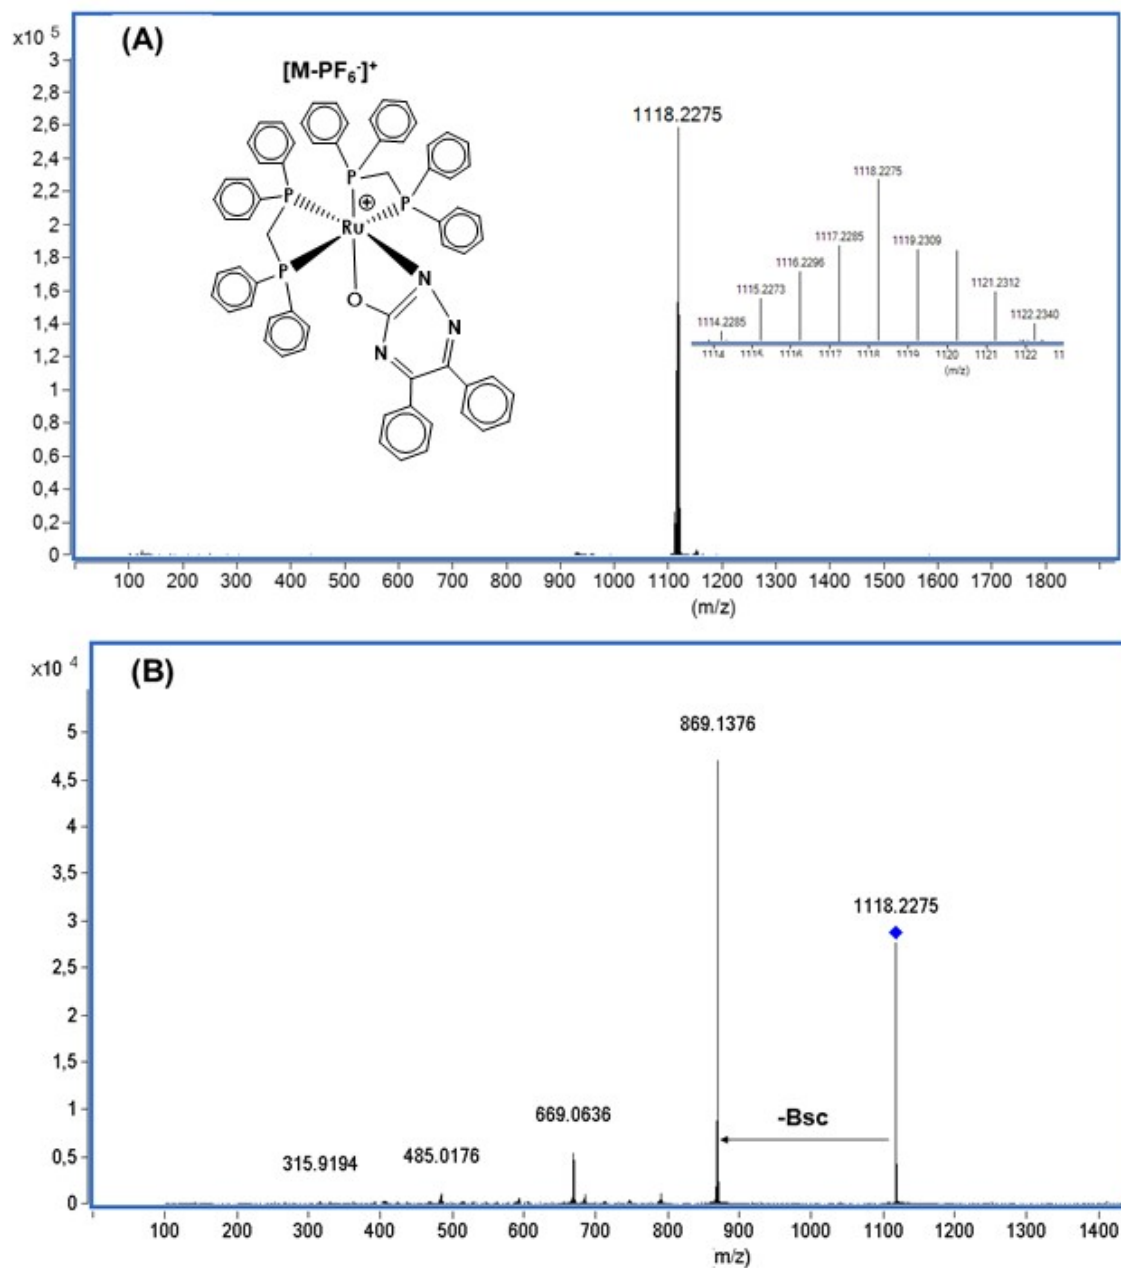

**Figure S20.** (A) HRESI-MS mass spectrum of complex **2**. (B) HRESI-MS/MS spectrum with fragmentation pattern of complex **2**.

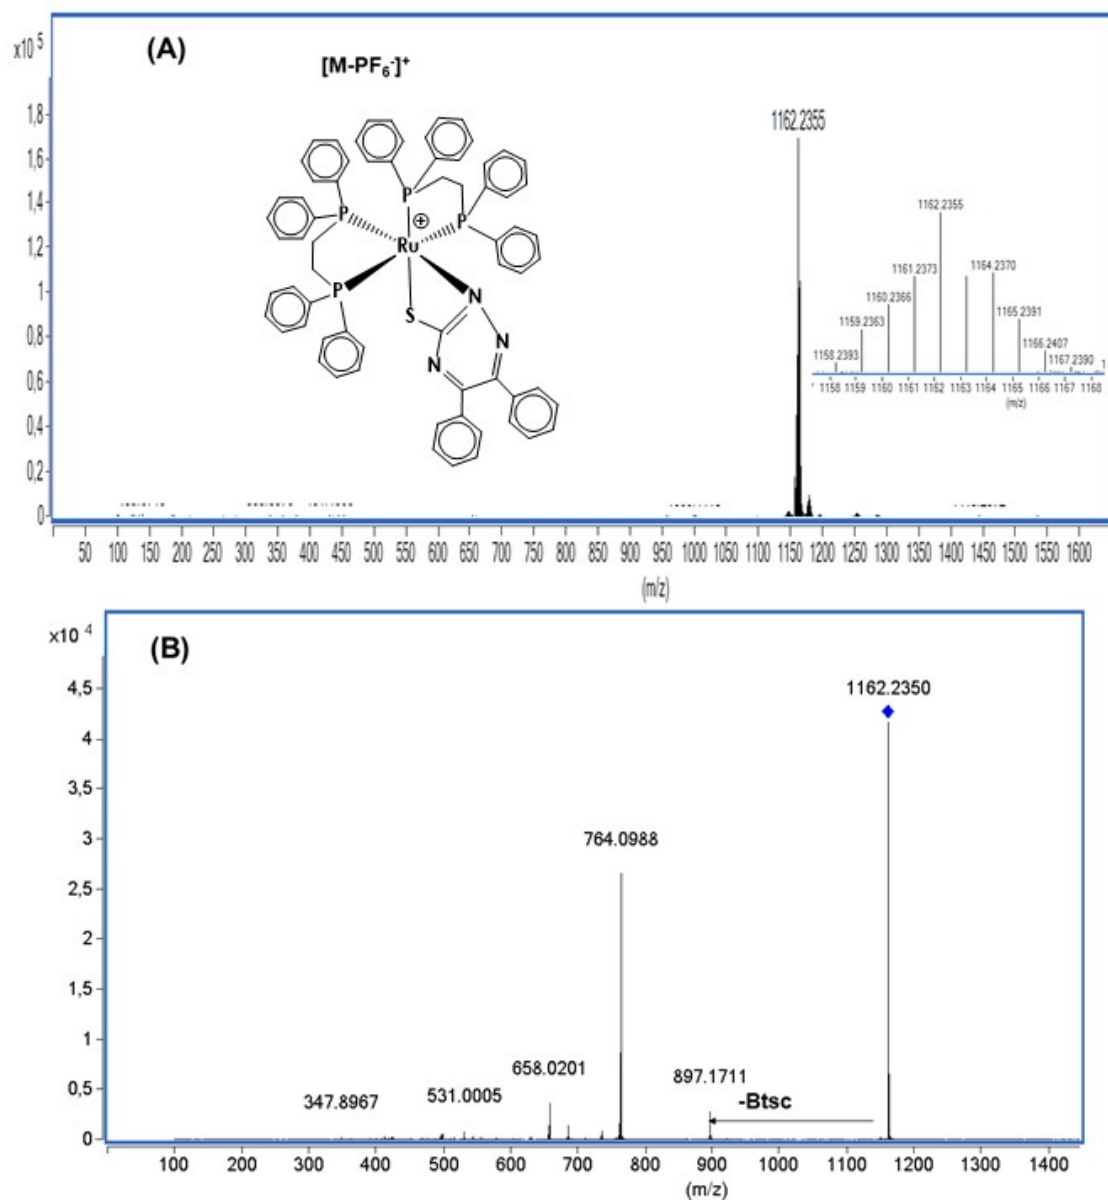

**Figure S21.** (A) HRESI-MS mass spectrum of complex **3**. (B) HRESI-MS/MS spectrum with fragmentation pattern of complex **3**.

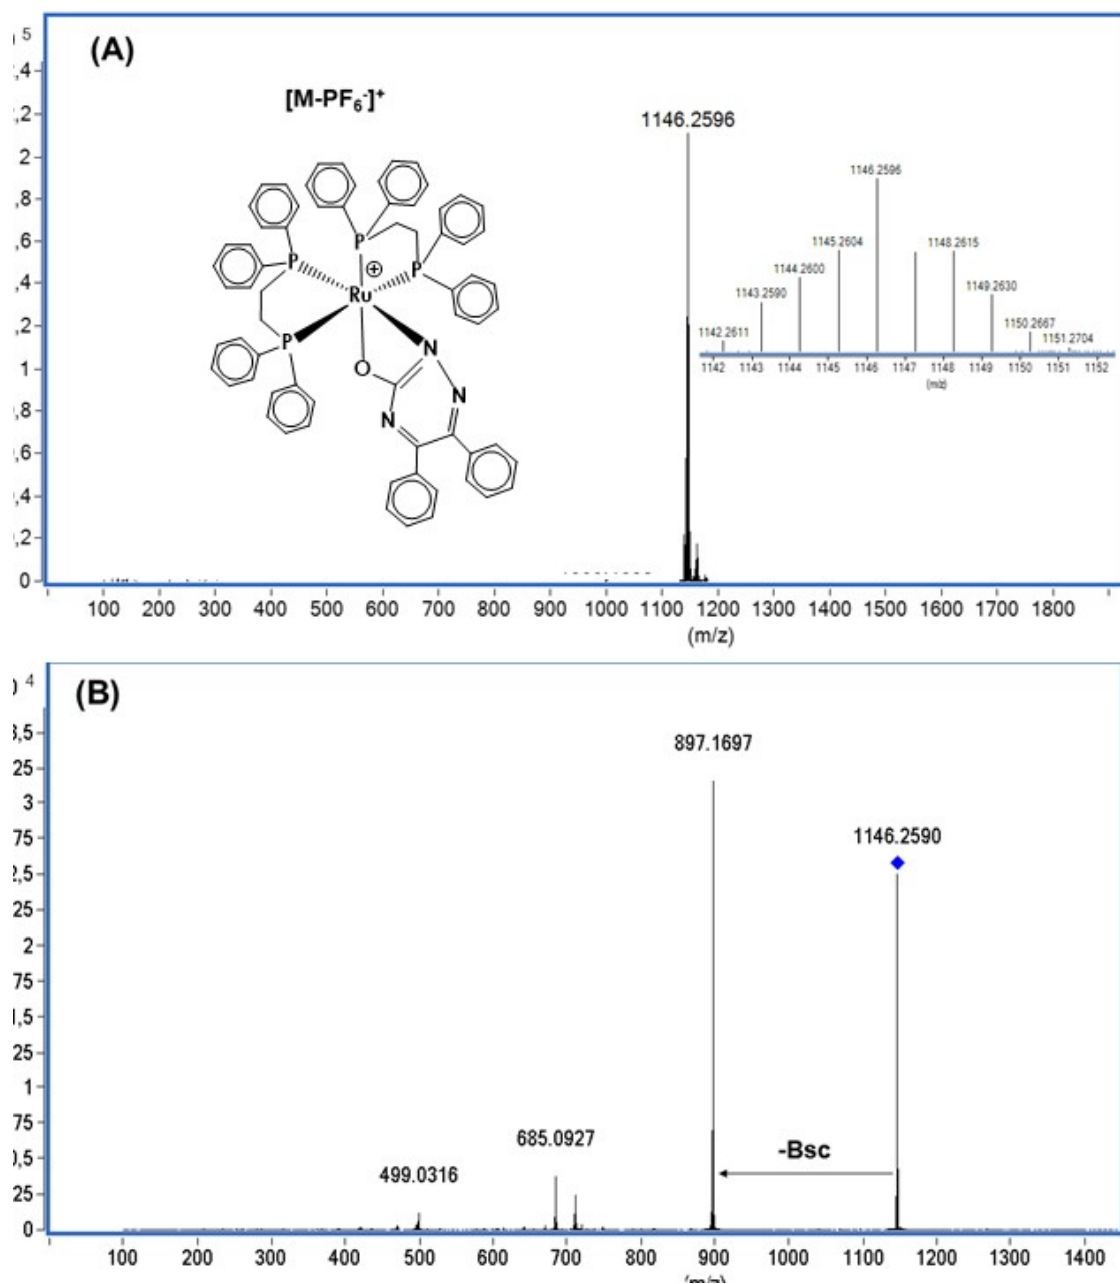

**Figure S22.** (A) HRESI-MS mass spectrum of complex **4**. (B) HRESI-MS/MS spectrum with fragmentation pattern of complex **4**.
